# Supplementary material
Source: PubMed Central journal article supplement (PMC2287360)
Supplement: plntphys_pp.107.109363_2.pdf [file plntphys_pp.107.109363_2.pdf]

**Supplemental data S1:** Effects of L-glutamate or L-glycine treatment doses on 24 h neo-elongated primary roots of *Brassica napus* seedlings under homogeneous feeding of nitrate (1 mM) on agarose gel (n= 12-16 seedlings). See Fig.1A to get experimental procedure used to measure 24 h old neo-elongated primary root after treatments. Data were analysed by the non parametric test of Kruskal Wallis. Then, Mood median test have been used to compare means or medians; bars sharing different letters are significantly different at  $P = 0.05$  (Sokal and Rohlf, 2003).
