# Supplementary material
Source: PubMed Central journal article supplement (PMC2287360)

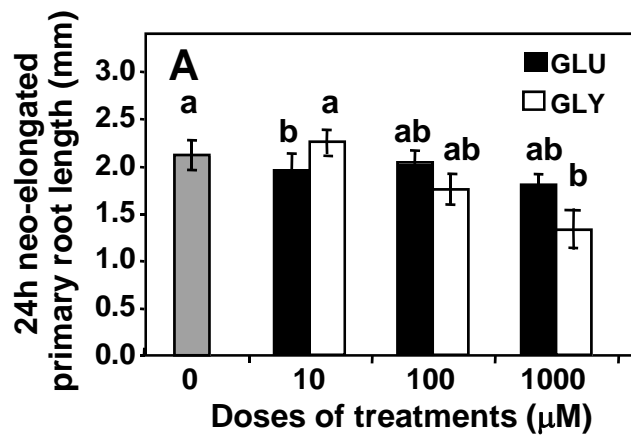

**Supplemental data S1:** Leblanc *et al.*, (2007)  
PlantPhysiol/2007/109363

Supplement: plntphys_pp.107.109363_1.pdf [file plntphys_pp.107.109363_1.pdf]
